# Supplementary material
Source: PubMed Central journal article supplement (PMC5542845)
Supplement: NIHMS886706-supplement-Supp_info.pdf [file NIHMS886706-supplement-Supp_info.pdf]

## Supplementary Methods

### Study Subjects

All 1112 Chinese ICP patients were of Han origin. A clinical diagnosis of chronic pancreatitis was based on two or more of the following criteria as previously described [Zou et al., 2016]: (i) presence of a typical history of recurrent pancreatitis; (ii) radiological findings such as pancreatic calcification and/or pancreatic irregularities revealed by endoscopic retrograde pancreatography or by magnetic resonance imaging of the pancreas; and (iii) pathological sonographic findings. ICP was defined as having neither reported family history of the disease nor recognized precipitating factors such as alcohol abuse, trauma, medication, infection and metabolic disorders.

### Cell Culture and Transfection

HEK 293T cells (GenHunter, Nashville, TN) were cultured in 6-well tissue culture plates at a density of  $1.5 \times 10^6$  cells per well, in Dulbecco's Modified Eagle Medium (DMEM) (Life Technologies, Grand Island, NY) supplemented with 10% fetal bovine serum, 4 mM glutamine and 1% penicillin/streptomycin at 37°C. Transfections were performed with 4 µg plasmid DNA and 10 µL Lipofectamine 2000 (Life Technologies) in 2 mL DMEM medium. After overnight incubation, the transfection medium was removed, cells were rinsed and covered with 2 mL OptiMEM reduced serum medium (Life Technologies). Conditioned medium was harvested 48 hours after the addition of OptiMEM.

### Measurement of Procarboxypeptidase Secretion

Protein levels of CPA1 zymogen in the conditioned medium were measured by SDS-PAGE, Coomassie staining and densitometry. An aliquot (200 µL) of the medium was precipitated with 10% trichloroacetic acid (final concentration), the precipitate was recovered by centrifugation, dissolved in 20 µL Laemmli sample buffer containing 100 mM DTT, and heat-denatured at 95°C for 5 min. Samples were electrophoresed on 15% SDS-polyacrylamide mini gels and proteins were stained with Coomassie Blue (Brilliant Blue R-250). Quantitation of bands was carried out with the GelDocXR+ gel documentation system and Image Lab 3.0 software (Bio-Rad, Hercules, CA).

### Measurement of CPA1 Activity

CPA1 zymogen was activated with 100 nM human cationic trypsin and 50 nM human CTRC, for 1 h at 37°C. The 40 µL activation mixture contained 20 µL conditioned medium, 0.1 M Tris-HCl (pH 8.0), 1 mM CaCl<sub>2</sub>, and 0.05% Tween 20 (final concentrations). Carboxypeptidase activity was then measured by adding 50 µL assay buffer (0.1 M Tris-HCl (pH 8.0), 1 mM CaCl<sub>2</sub>, 0.05% Tween 20) and 10 µL of 600 µM N-[4-methoxyphenylazoformyl]-L-phenylalanine substrate to the activation mix (100 µL final volume, 60 µM final substrate concentration). The decrease in absorbance was followed at 350 nm for 2 min. Rates of substrate cleavage were calculated from fits to the initial linear portion of the curves and were expressed as percent of the wild-type rate.

### Exon 1

Exon1\_F CGGTCCTGGGAGGGTTTAAAA  
Exon1\_R TCTGTCTGTCTCCTCTACTGGTTG

ccttctccgctaccagtgaggcaaacagaaccgcagctttaggggtgtgggcaggcagagtcctggctgggactccaggaggcctcgagccc  
cgctgaccctcagggccgctggcccagatggctgggggtggagctctggcttatctctccagctgccagttccctgccactttatcatggag  
ggtgagaggggtgcagagctcAGAACTCCCACCCAGCCTCCCCGTGGGACAGGACCCAGGTGCTGGGG  
GAGAACAGACCTCGGGAGCAGCCAGGAGTCTC**CGGTCCTGGGAGGGTTTAAAAGCCAGGGGG**  
CCGTCTCGACCTCAGTCTGACCTTCCTCCCGGCAGCAGC**ATGCGGGGGTTGCTGGTGTGAGT**  
**GTCCTGTTGGGGCTGTCTTTGGCAAGGAGGACTTTGTGGG**GTAGGGATGTGGAGAGGAGGGG  
GTGCCCTCTGAGGGTGTAGGGGAGGACTCAGCCCC**CAACCAGTAGAGGAGACAGACAGACAG**  
ATACATGGCAACACAGCCAGAGAGGATGGCCTGGCACCACCTGGGACAGCTGGCAGATAAGCAA  
CCAGGGTTGGGAAGAGGTTGTGTCTCCAAGACAGTCTCCTGAGCCCTGGAGAAACCTGAGCTC  
TGAGGAGGAGTTTTTCAGGAGAGGAGAAAGGAGGA

### Exon 2

Exon2\_1\_F ACAGCGTCTAGAAGTTTCTAAAGATGG  
Exon2\_1\_R AGCTCCTTCACCTTCTGTACCT  
Exon2\_2\_F CAGGTGCTCCGAATCTCTGTAG  
Exon2\_2\_R AGAGTCAATTCCATGTCTCCTTGTG

GGCCTGGCTGGCTTGGAAACAGAGAAATAGTCCAAACTGGGATTGAGATAGTA**ACAGCGTCTAGA**  
**AGTTTCTAAAGATGG**GGAGAGAAGAGGTGAGGGAGCCAGGCCTCTCCTTGTGAGACCCTTG  
GTGCTGTCCCCTGCCAGCCAGAGGACGAGGCCAGTCTGGGGATTCTGGGCTGCTGCCTCC  
CTCCTGCACCTGGGGAGTGCTTGTGGCCAGGGCAGGTGCAGCTTGGGTGCTCACTCCCCACTC  
CCTCTGCCAG**GCATCAGGTGCTCCGAATCTCTGTAGCCGATGAGGCCAGGTACAGAAGG**  
**TGAAGGAGCTGGAGGACCTGGAGCACCTGCAG**GTGAGAAGAGGGGAGAAGGGCTCTCTGAG  
CCCCAGGGTATCAGCTGGGGCCACCCAGGTCCCAGCGGCCAACTGTGCCTGGGCTGTCTCC  
ACC**CAACAAGGAGACATGGAATTGACTCT**GTTAGGAAGCGACTTCAAGCCCCAGCTCCAGAG  
CCTTGCTGCCCTT**GAGCACCTGGGCAAGGGGCCGGGCCCTTTCCAGTTCTCCTCTGCCTTG**  
CTGTCTCAAAGGCCCTCACTCTGCTCCTGGGCCATTTCCCTGACCACACTGGACTCTC

### Exon 3

Exon3\_1\_F CCAATTATATGAGAACTTCTGGCACCAA  
Exon3\_1\_R CTCGATCATGGTCTCATAGCTGATG  
Exon3\_2\_F CCAGGCGGTCAAGATCTTTCTG  
Exon3\_2\_R TAGGTGGCGTAGTTAAAAGTGTGC  
Exon3\_3\_F CAGGAGCAGATGTTCCGCCTT  
Exon3\_3\_R CAATGGAGCTACGACCACACA

GAGCCTTGCTGCCCTT**GAGCACCTGGGCAAGGGGCCGGGCCCTTTCCAGTTCTCCTCTGCC**  
TTGCTGTCTCAAAGGCCCTCACTCTGCTCCTGGGCCATTTCCCTGACCACACTGGACTCTCCAG  
TCCCAGGGTTTCCCCTGATTTCTCTGGCCCTATTACCCTGACCTATCC**CCAATTATATGAGAA**  
**CTTCTGGCACCAA**CAGCCCCTCCCACGCAGGCCCTGTCCCTGCCTGCTGTCTGGCTGGTGGC  
CCCAGCCCGCTGTGACCGTGCCGGCTCTTGTCTCCTCCCAG**CTGGACTTCTGGCGGGGGCTGC**  
**CCACCTGGCTCCCCATCGACGTCCGAGTGCCCTTCCCAGCATCCAGGCGGTCAAGATCTTT**  
**CTGGAGTCCCACGGCATCAGCTATGAGACCATGATCGAG**GACGTGCAGTCGCTGCTGGACGAG  
**GAGCAGGAGCAGATGTTCCGCCTTCCGGTCCCGGGCGCGCTCCACCGACACTTTTAACTACGCC**  
**ACCTACCACACCCTGGAGGAG**GTGAGGGCGCCCTAGCGGCCGCTCCCTGCAGCCACCAGCTC  
TTCATCATGGCTGGTAGAACCGGGTAGGGCCAAGGCCAGGGCCAGCCTGGGTGTGCGCAGCGC  
CTGCTCTGTTTCCATGTGGCC**TGTGTGGTCTGACTCCATTG**CAGGGCTCGCAGCAGGCTGGGA  
CGGTG

### Exon 4

Exon4\_F TCTGGGTGCCCAGAAGCTATTA  
Exon4\_R TGTTCCCTGGTACCATGATTTCC

GGGCTGCTAAGGGAAGCATTCTGGGTGCCAGAAAGCTATTAAAGGCCAGTGGTCTCTTCTTTTCCACA  
CCTCAGATCTATGACTTCCTGGACCTGCTGGTGCCGAGAACCCGCACCTTGTGTCAGCAAGATCC  
AGATTGGCAACACCTATGAAGGGCGTCCCATTACGTGCTGAAGGTAACATCCACATGTGGACAT  
ACACAGGGGAGAATGGACCCACACGTGGCATCCGTGATGGGCGTGGGCTCTCCCGGGAAATC  
ATGGTACCAGGGAACACGCTGTAAATGGACTCCCCATGCAGACATTTGGAAAGGCCTGAGTCT  
CCACCCTGGTCTTGGCGTGTGCACTCCTGCCAT

### Exon 5

Exon5\_1\_F AAGCAGAGCCTCTACCTGAGAT  
Exon5\_1\_R GCCTTACCTTCTTTGCAAACCAGA  
Exon5\_2\_F CAGTAAGCGTCCAGCCATCT  
Exon5\_2\_R CCACAGCAATGGACACCTTTC

GCCCCACAAAGCAGAGCCTCTACCTGAGATACACAGAGAGCAGGTGGTCTCTGGCCAGGTCGG  
GGTCTCCTTCAGGGCAGCAAGATGAGGCCTCAGCTGTGAAATTGCCTCTGATCACTCCCCTGCC  
TCCTCTCCAGTTCAGCACGGGGGGCAGTAAGCGTCCAGCCATCTGGATCGACACGGGCATCCA  
TTCCCGGGAGTGGGTCACCCAGGCCAGTGGGGTCTGGTTTGCAAAGAAGGTAAGGCCGGGGA  
GGTGAAGAGGGCTCTCACCTGGTGGGGCATTGGTGTCCAAGGCCACAGAAGCCCGGGCCTCC  
CTTTGCCCATCCAGAAGCAGTGACCACAGAGGACATGGGGAAAGGTGTCCATTGCTGTGGCTTG  
GCAGATGCCTGGCCAGCCTGCGCTGCCCTCTGCTCC

### Exon 6

Exon6\_F GGGAAAGGTGTCCATTGCTGT  
Exon6\_R GGGTGAACTACTTGTGCAGCTT

ACAGAAGCCCAGGCTCCCTTTGCCATCCAGAAGCAGTGACCACAGAGGACATGGGGAAAGG  
TGTCCATTGCTGTGGCTTGGCAGATGCCTGGCCAGCCTGCGCTGCCCTCTGCTCCTCTAACC  
CCCCAGATCACTCAAGACTACGGGCAGGATGCAGCTTTCACCGCCATTCTCGACACCTTGGACAT  
CTTCTGGAGATCGTCACCAACCCTGATGGCTTTGCCTTCACGCACAGCACGGTACCGGCCTTCT  
CCTGTCTTGGGGGAAGCAGGATGGCCTCTGGCTTCTAAGCTGCACAAGTAGTTCACCCCTAA  
TCTCAAGCCCCAGAAGTCAAGGGAGGGGCAATCAGA

### Exon 7

Exon7\_F CCAATCAGGGCACTTGTGTTG  
Exon7\_R CATCCTTGCTCCCAAGACACT

CCGACAACCAGCTGGGAGTGGATCCCATCCCAAGCTGTGCCTGCAGCTCAGCTTCCAATCAGGG  
CACTTGTGTTGAGGGCTTCCACCTCCAGGGAGCCCTCCCCTCAGTCCACTCTGCTCTCTGCAGC  
CTCTGAACCACCCCCACCCAGCACTGTGACAAGCGTCACACGTGCCTCGGGGTGGCTGATCCC  
ATTTCTTCTCAGAAATCGCATGTGGCGCAAGACTCGGTCCACACAGCAGGCTCCCTCTGTATT  
GGCGTGGACCCCAACAGGAAGTGGGACGCTGGCTTTGGGTGTAAGGCCCAGAGTGTCTTGGGA  
GCAAGGATGGGATGGCCTCGAATGGCTCCTCACCCTGCTCTTGTCTCCCCGCTCTCTCCTGCC  
CCTGCAGTGAGGGGAGGGTTGGGGGTGGCAGCTCTGC

### Exon 8

Exon8\_1\_F GGTTATAGAAGGCCTTTGGGCTT  
Exon8\_1\_R GGTCCTTCACAAAGTCTACAATGGA  
Exon8\_2\_F GGCAAGTTTGCCAATTCCGAAG  
Exon8\_2\_R TGTGCCTTAAGCAGGTCTGATG

CCCCAGGTTATAGAAGGCCTTTGGGCTTCTCTGAATCCAGGGGTGGGAGTGAGCCCTTCCATAC  
CACCTCACCCCAACTCCATGCAAAGAACTGGATTCCAGAAGCCACAGAAGCTGGAGGAGCCAC  
ACCGCCATGCCCTCTGTCCCCCACAGTGTCCGGAGCCAGCAGTAACCCCTGCTCGGAGACTTA  
CCACGGCAAGTTTGCCAATTCCGAAGTGGAGGTCAAGTCCATTGTAGACTTTGTGAAGGACCAT  
GGGAACATCAAGGCCTTCATCTCCATCCACAGCTACTCCAGCTCCTCATGTATCCCTATGGCTA  
CAAAACAGAACCAGTCCCTGACCAGGATGAGCTGGTAGGCACTGACCTCGGCTTGCCCCCTCGT

CCCCAAGGTGGCTTCGGACAGGCCAGGCTTTCCCCCATCAGACCTGCTTAAGGCACAGACAC  
CTCCAGAGTACCTGACACCCTTCCTTCCCTGATGGCTTGGGAAGACCAGCGGGTGGACTAACCA  
TTTTTCTGGGAAACTGAGGCACAGGAGTGATGGAGTCACTTCTGTAATGTGACAGAGCAAGGGG  
CAGGGCTAGACTTCGAT

### Exon 9

Exon9\_F GACTACCCTGGACATGCTGTTC  
Exon9\_R GATACTCCCTCGGTCAGGAAGA

TGTGCTCCCTGCTGGAGGCCACTTCTGCAGGGTGCTTCTCCTAGGCTCCCCTGCCAGCCCCCA  
GACTACCCTGGACATGCTGTTCCAGGAGCCTGGCCATGACAGGTGGCTTTGCTTGGTGTTTTGT  
CCAGGATCAGCTTTCCAAGGCTGCTGTGACAGCCCTGGCCTCTCTCTACGGGACCAAGTTCAAC  
TATGGCAGCATCATCAAGGCAATTTGTAAGTGGCCGTAGGGTCTCTCTTGTATGGGCCTGCGAGG  
AACATCTGCTGGCTTCTTCCTGACCGAGGGAGTATCCTCATGGAAGGAAGTAGCCAAGGGCACC  
CAGATCTG

### Exon 10

Exon10\_1\_F CTCTTTGGACCTCTTGGCTTAGA  
Exon10\_1\_R AGCTCGAAGGTGAAGGAGTACTT  
Exon10\_2\_F GAAGCACTATTGACTGGACCTACA  
Exon10\_2\_R CTCAAACCTTTATTTGGTTGCCTGGAT

AGAGACTTCCTTGCATCCCCTAGTGAATAGGGGAACCATTGCTGGTCTCCTCTTTGGACCTCTTG  
GCTTAGACCTTTTAGTGGGAGTTTCTTGGAAAGTGAGGCTGCTTGGTCAACAGCAGACCTTAGTAG  
ACACTGACTCCACTCAGCATTGCACAAGGCACAGAGCTTTGGACAGGGTTGGATCGTTAACCCAA  
CCCGTGTAATATTCCCAAAGTGATTGACCCTTCTCCTATTTTACTCCTGCCCCAGATCAAGC  
CAGTGAAGCACTATTGACTGGACCTACAGCCAGGGCATCAAGTACTCCTTCACCTTCGAGCTC  
CGGGACACTGGGCGCTATGGCTTCTGCTGCCAGCCTCCCAGATCATCCCCACAGCCAAGGAGA  
CGTGGCTGGCGCTTCTGACCATCATGGAGCACACCCTGAATCACCCCTACTGAGCTGACCCTTT  
GACACCCTTCTTGTCTCCTCTCTGGCCCCATCCAGGCAACCAAATAAAGTTTGAGTGTACCAG  
GAACAGAATCCTGGGGCTTGCAtggtggagtgtctgcctctcaagctggggcaaaagtgatttaattctgcaggcctcactggaa  
atgtgtgggtgggtggactagatgaccctacattcccctgcattccaacatcctgtgaagtcgatccaagtgcgctgttttaattagaccacct  
gagttcagctcaccagtgatgattgttcataccttagtagcaagcagcagcaacagctgctaaccaaatgccggcaccacacagtggtg  
ggaattcggcgtgtacaaaggctagctagctgtgtcca

**Supplementary Figure S1.** Sequence information pertaining to the targeted sequencing of the *CPAI* gene. The sequences of the 16 primer pairs are first provided, followed by an illustration of their respective locations within the *CPAI* genomic sequence using different underlines, in the context of the 10 exons. Coding sequences are highlighted in blue. The *CPAI* genomic sequence was obtained from human GRCh37/hg19.

## Exons 1-2

**ccttctccgctaccagtg**gcaaacagaaccgcagcttaggggtgtgggcagggcagagctctggctgggactccaggaggcctcgagcc  
cccgctgaccctcaggccccgctgccccagatggctgggggtggagctctggcttatctc**ccagctgccagttccctg**ccactttatcatgga  
gggtgagaggggtgtcagagctcAGAACTCCCACCCAGCCTCCCCGTGGGACAGGACCCAGGTGCTGGG  
GGAGAACAGACCTCGGGAGCAGCCAGGAGTCCTCGGTCTGGGAGGGTTTAAAAGCCAGGGGG  
CCGTCTCGACCTCAGTCTGACCTTCCCTCCCGGCAGCAGC**ATGCGGGGGTTGCTGGTGTGAGT**  
**GTCCTGTTGGGGGCTGTCTTTGGCAAGGAGGACTTTTGTGGG**GTAGGGATGTGGAGAGGAGGGG  
GTGCCCTCTGAGGGTGTATGGGGAGGACTCAGCCCCAACCAGTAGAGGAGACAGACAGACAGA  
TACATGGCAACACAGCCAGAGAGGATGGCCTGGCACCACCTGGGACAGCTGGCAGATAAGCAA  
CCAGGGTTGGGAAGAGGTTGTGTCTCCAAGACAGTCTCCTGAGCCCTGGAGAAACCTGAGCTC  
TGAGGAGGAGTTTTTCAGGAGAGGAGAAAGGAGGAGGCCTGGCTGGCTTGGAAACAGAGAAATAG  
TCCAAACTGGGATTGAGATAGTAACAGCGTCTAGAAGTTTCTAAAGATGGGGAGAGAAGAGGTGA  
GGGAGCCCAGGCCTCTCCTTGTGAGACCCTTGGTGCTGTCCCCTGCCAGCCCAGAGGACGA  
GGCCAGTCTGGGATTCTGGGCTGCTGCCTCCCTCCTGCACCTGGGGAGTGTGTGGCCAG  
GGCAGGTGCAGCTTGGGTGCTCACTCCCCTCCACTCTGCCAG**GCATCAGGTGCTCCGAAT**  
**CTCTGTAGCCGATGAGGCCAGGTACAGAAGGTGAAGGAGCTGGAGGACCTGGAGCACCTGCA**  
**GT**CAGAAGAGGGGAGAGAAGGGCTCTCTGAGGCCAGGGTATCAGCTGGGGCCACCCAGGTCC  
CCCAGCGGCCAACTGTGCCTGGGCTGTCTCCACCCAACAAGGAGACATGGAATTGACTCTGTTA  
GGAAGCGACTTCAAGCCCCAGCTCCAGAGCCTTGCTGCCCTTGGACACCTGGGCAAGGGGCC  
GGGCCCTTTCCAGTTCCCTCTGCCTTGCTGTCTCAAAGGCCCTCACTCTGCTCCTGGGC  
CATTTC**CCTGACCACACTGGACTCTC**

## Exons 3-4

**GAGCCTTGCTGCCCTTGAGC**ACCTGGGCAAGGGGCCGGGCCCTTTCCAGTTCCTCCCTCTGC  
CTTGCTGTCTCAAAGGCCCTCACTCTGCTCCTGGGCCATTT**CCTGACCACACTGGACTCTCCA**  
GTCCCCAGGGTTTCCCCGTATTTCTCTGGCCCTATTACCCCTGACCTATCCCCAATTATATGAGAA  
CTTCTGGCACCAACAGCCCCTCCCACGCAGGCCCTGTCCCTGCCTGCTGTCTGGCTGGTGCC  
CCAGCCCCTGTGACCGTGCCGGCTCTTGTCTCCAG**CTGGACTTCTGGCGGGGGCCTGCC**  
**CACCCTGGCTCCCCATCGACGTCCGAGTGCCTTCCCAGCATCCAGGCGGTCAAGATCTTTC**  
**TGGAGTCCCACGGCATCAGCTATGAGACCATGATCGAGGACGTGCAGTGCCTGCTGGACGAGG**  
**AGCAGGAGCAGATGTTTCGCTTCCGGTCCCGGGCGCGCTCCACCGACACTTTTAACTACGCCAC**  
**CTACCACACCCTGGAGGAG**GTGAGGGCGCCCTAGCGGCCGCTCCCTGCAGCCACCAGCTCTT  
CATCATGGCTGGTGA**GAACCGGGTAGGGCCAAGGC**CAGGGCCAGCCTGGGTGTGCGCAGCGCCT  
GCTCTGTTTCCATGTGGCCTGTGTGGTCTGATCTCCATTGCAGGGCTCGCAGCAGGCTGGGACG  
GTGGGGCTGCTAAGGGAAGCATCTGGGTGCCAGAAGCTATTAAGGCCAGTGGTCTCTTCTTTC  
ACACCTCAG**ATCTATGACTTCTGGACCTGCTGGTGGCGGAGAACCCGCACCTTGTGAGCAAGA**  
**TCCAGATTGGCAACACCTATGAAGGGCGTCCCATTTACGTGCTGAAGGTAACATCCACATGTGGA**  
CATAACAGGGGAGAATGGACCCACACGTGGCATCCGTGATGGGCGTGGGCTCTCCCGGGGAA  
ATCATGGTACCAGGGAACACGCTGTAAATGGACTCCCCTATGCAGACATTTGAAAGGCCTGAGT  
CTCCACCCTGGTCTTG**GCGTGTGCACTCCTGCCAT**

## Exons 5-6

**GCCCCACAAGCAGAGCCTCT**ACCTGAGATACACAGAGAGCAGGTGGTCTCTGGCCCAGGT**CGG**  
**GGTCTCCTTCAGGGCAGCA**AGATGAGGCCTCAGCTGTGAAATTGCCTCTGATCACTCCCCTGCC  
TCCTCTCCAG**TTCAGCACGGGGGGCAGTAAGCGTCCAGCCATCTGGATCGA**  
**CACGGGCATCCATTCCCGGGAGTGGGTACCCAGGCCAGTGGGGTCTGGTTTCAAAGAAGGT**  
AAGGCCGGGAGGTGAGGAGGGCTCTCACCTGGTGGGGCATTGGTGTCAAAGGCCACAGAAAG  
CCCGGGCCTCCCTTTGCCATCCAGAAGCAGTGAACACAGAGGACATGGGGAAAGGTGTCCATT  
GCTGTGGCTTGGCAGATGCCTGGCCAGCCTGCGCTGCCCTCTGCTCCTAACCCTCCAG**AT**  
**CACTCAAGACTACGGGCAGGATGCAGCTTTTACCAGCCATTCTCGACACCTTGGACATCTTCTGG**  
**AGATCGTACCAACCCTGATGGCTTTGCCTTACCGCACAGCACGGTACCGGCCTTCTCCTGTCTT**  
TGGGGGAAGCAGGATGGGCCTCTGGCTTCTAAGCTGCACAAGTAGTTCACCCCTAATCTCAAGC  
CCAGAAGTCAAGGAGGGGCAATCAGACCTGT**GCTCCTAGCCGAGGGTGTCT**

## Exons 7-9

**CCGACAACCAGCTGGGAGTG**GATCCCATCCAAGCTGTGCCTGCAGCTCAGCTTCCAATCAGG  
GCACTTGTGTTGAGGGCTTCCACCTCCAGGGAGCCCTCCCCTCAGTCCACTCTGCTCTCTGCAG  
CCTCTGAACCACCCCCACCCAGCACTGTGACAAGCGTACACGTGCCTCGGGGTGGCTGATCC  
CATTTCCTTCTCAG**AATCGCATGTGGCGCAAGACTCGGTCCCACACAGCAGGCTCCCTCTGTAT**  
**TGGCGTGGACCCCAACAGGAAGTGGGACGCTGGCTTTGGGTGTAAGGCCAGAGTGTCTTGGG**

AGCAAGGATGGGATGGCCTCGAATGGCTCCTCACCCTGCTCTTGCTCCCCGCCTCTCTCCTGC  
CCCTGCAGTGAGGGGAGGGTTGGGGGTGGCAGCTCTGCCTCTGAGGGCTCTTGGGGATGGAG  
GCTGTGCTCTGAGAGTTGGTTGTTACTCGCCTGCAAAGGCAAGTTGCTTGCAAATGGGCTAAGG  
TCTGAAATCCTACCTAGGGGGCTTCTAGCTTAACCTCAAGTCCTCCCGCCTTGCCACGTCTCTG  
TGAGAACTGGTCTCCACTGAGGAGCCGTCTTCCCTCCCTGGGTGTGTCCATCAGCTCTGCCCA  
AACCAGGCTGGGAGGGCAGTTCCCCCAGGTTATAGAAGGCCTTTGGGCTTTCTGAATCCAGGG  
GTGGGA**GTGAGCCCTTCCATACCACC**TACCCCCAACTCCATGCAAAGAACTGGATTCCAGAAG  
CCACAGAAGCTGGAGGAGCCACACCGCCATGCCCTCTGTCCCCCACAG**TGTCCGGAGCCAGC**  
**AGTAACCCCTGCTCGGAGACTTACCACGGCAAGTTTGCCAATTCCGAAGTGGAGGTCAAGTCCAT**  
**TGTAGACTTTGTGAAGGACCATGGGAACATCAAGGCCTTCATCTCCATCCACAGCTACTCCCAGC**  
**TCCTCATGTATCCCTATGGCTACAAAACAGAACCAGTCCCTGACCAGGATGAGCTGGTAGGCAT**  
GACCTCGGCTTGCCCCCTCGTCCCCAAGGTGGCTTCGGACAGGCCAGGCTTTCCCCCATCAGA  
CCTGCTTAAGGCACAGACACCTCCAGAGTACCTGACACCCTTCCCTCCCTGATGGCTTGGGAAGA  
CCAGCGGGTGGACTAACCATTTTTTCTGGGAAACTGAGGCACAGGAGTGATGGAGTCACTTCTGT  
AATGTGACAGAGCAAGGGGCAGGGCTAGACTTCGATCTTAGGCACCACAT**TGTGGAGGTGCATGT**  
**GCCTGA**AGGGCAGGGAAGGCCAGCCGGACACCCTGAAGGGCCAGAAAAGTGTGCTGACAGGCT  
CCCGGGCTGAGCTTCCAGGCTAAGCAGGCTCTGTGCTCCCTGCTGGAGGCCACTTCTGCAGG  
GTGCTTCTCCTAGGCTCCCCTGCCAGCCCCCAGACTACCCTGGACATGCTGTTCCAGGAGCCTG  
GCCATGACAGGTGGCTTTGCTTGGTGTGTTTGTCCAG**GATCAGCTTTCCAAGGCTGCTGTGACAGC**  
**CCTGGCCTCTCTACGGGACCAAGTTCAACTATGGCAGCATCATCAAGGCAATTTGTAAGTGGC**  
CGTAGGGTCTCTTGTATGGGCTGCGAGGAACATCTGCTGGCTCTTCCCTGACCGAGGGAGTAT  
CCCTCATGGAAGGAAGTAG**GCCAAGGGCACCCAGATCTG**

### Exon 10

**GGAAGTGAGGCTGCTTGGTCAACAGCAGACCTTAGTAGACACTG**ACTCCACTCAGCATTGCACA  
AGGCACAGAGCTTTGGACAGGGTTGGATCGTTAACCCAACCCGTGTAAATATTCCCAAAGTGATT  
GACCCTTTCTCCTATTTTTACTCCTGCCCCAG**ATCAAGCCAGTGGAAAGCACTATTGACTGGACC**  
**TACAGCCAGGGCATCAAGTACTCCTTCACCTTCGAGCTCCGGGACACTGGGCGCTATGGCTTCC**  
**TGCTGCCAGCCTCCAGATCATCCCCACAGCCAAGGAGACGTGGCTGGCGCTTCTGACCATCAT**  
**GGAGCACACCCTGAATCACCCCTACTGAG**CTGACCCTTTGACACCCTTCTTGTCCCTCTCTGG  
CCCCATCCAGGCAACCAAATAAAGTTT**GAGTGTACCAGGAACAGAATCCTGGGGCTTGCAtgtggag**  
tgtctgcctctcaagctggggcaaaagtgatttaattcctgcaggcctcactggaatgtgtgggtggtgtagatgaccctacattcccct  
gcattccaacatcctgtgaagtcgatccaagtgctgtgttttaattagaccaccctgagttcagctcaccagtgggatgattgttcataccttag  
tagcaagcagcagcaacagctgctaaccaaatgcccgcaccccacagtggtgtggaattcggcgtgtacaa**aggctagctagctgtgt**  
**cca**

**Supplementary Figure S2.** Sequence information pertaining to the validation of targeted sequencing-derived *CPAI* variants by Sanger sequencing. Primer sequences used for amplifying the different exons are underlined. These primers were often used as sequencing primers. Further primers used for sequencing are indicated in red (forward) or green (reverse). Coding sequences are highlighted in blue. The *CPAI* genomic sequence was obtained from human GRCh37/hg19.



**Supplementary Table S1. All Rare *CPA1* Variants in Chronic Pancreatitis Patients and Controls in Different Populations**

| Population     | Disease subtype | Patients (%)          | Controls (%)          | OR          | 95% CI           | <i>P</i> value       |
|----------------|-----------------|-----------------------|-----------------------|-------------|------------------|----------------------|
| German         | NACP            | 37/944 (3.92)         | 53/3,938 (1.35)       | 2.99        | 1.95-4.58        | $1.3 \times 10^{-7}$ |
| Eur. rep.      | NACP            | 15/600 (2.50)         | 39/2432 (1.60)        | 1.57        | 0.86-2.87        | 0.14                 |
| Indian         | NACP            | 10/230 (4.35)         | 0/264 (0)             | Undefined   | Undefined        | 0.002                |
| Japanese       | NACP            | 6/247 (2.43)          | 0/341 (0)             | Undefined   | Undefined        | 0.005                |
| <b>Chinese</b> | <b>ICP</b>      | <b>20/1112 (1.80)</b> | <b>24/1580 (1.52)</b> | <b>1.19</b> | <b>0.65-2.16</b> | <b>0.57</b>          |

Data newly obtained in the Chinese population are highlighted in bold. Data from the other populations were derived from Witt et al. [2013].

Abbreviations: CI, confidence interval; Eur. rep., European replication; ICP, idiopathic chronic pancreatitis; NACP, nonalcoholic chronic pancreatitis; OR, odds ratio.
